# Supplementary material for: The Small RNA Teg41 Regulates Expression of the Alpha Phenol-Soluble Modulins and Is Required for Virulence in Staphylococcus aureus
Source: PubMed Central journal article supplement (PMC6428751; doi:10.1128/mbio.02484-18), 2019-02-05
Supplement: mBio.02484-18-sf001.pdf [file mBio.02484-18-sf001.pdf]

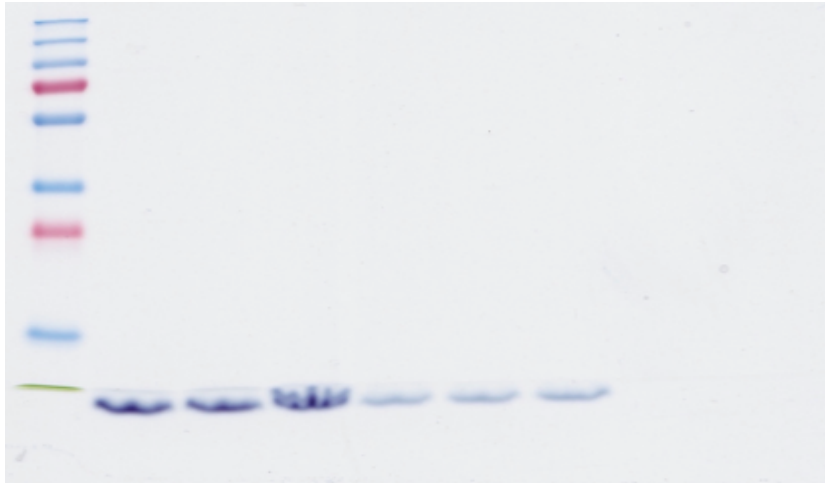

**Figure S1.** Full length gel from Figure 5B.
