# Supplementary material for: The Small RNA Teg41 Regulates Expression of the Alpha Phenol-Soluble Modulins and Is Required for Virulence in Staphylococcus aureus
Source: PubMed Central journal article supplement (PMC6428751; doi:10.1128/mbio.02484-18), 2019-02-05
Supplement: mBio.02484-18-sf002.pdf [file mBio.02484-18-sf002.pdf]

**A**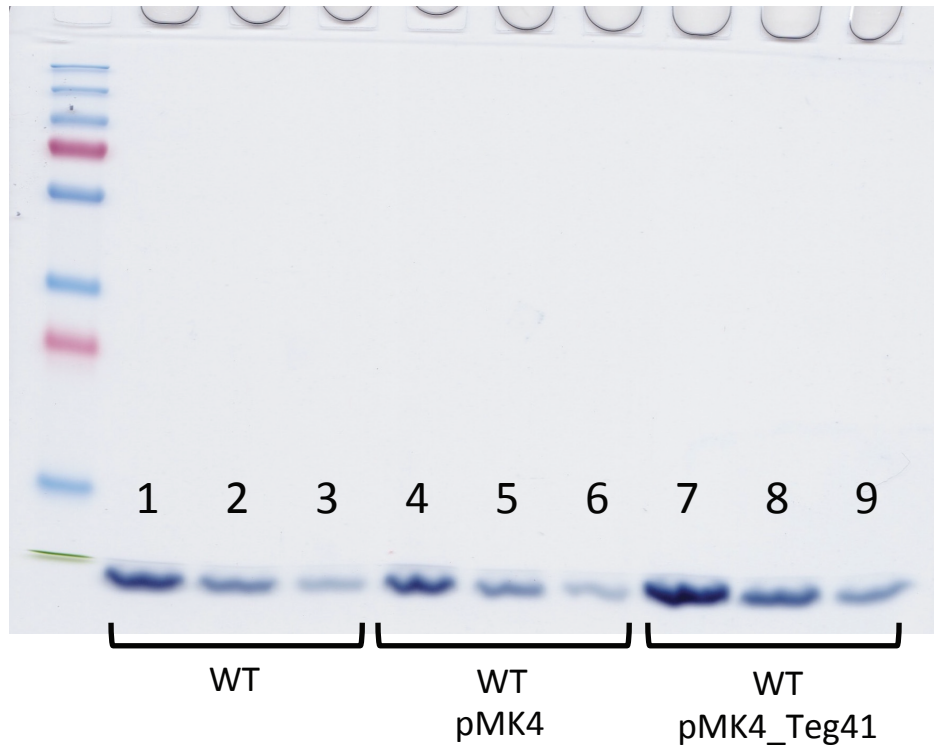**B**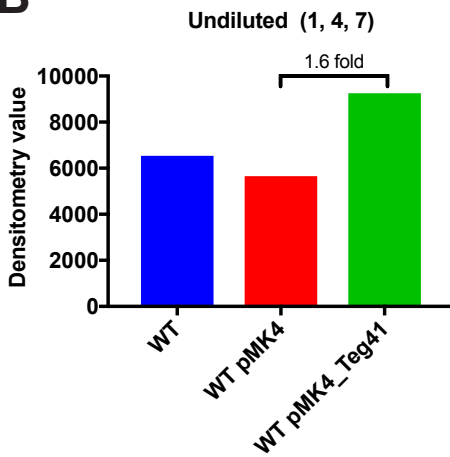**C**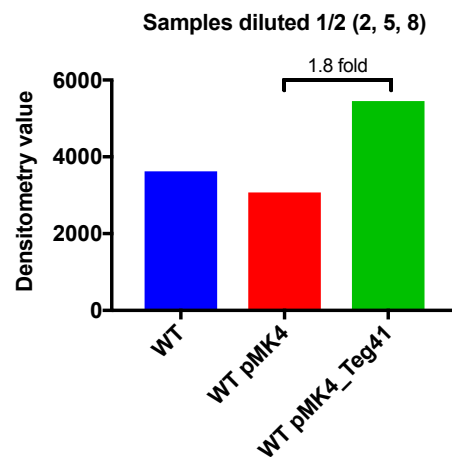**D**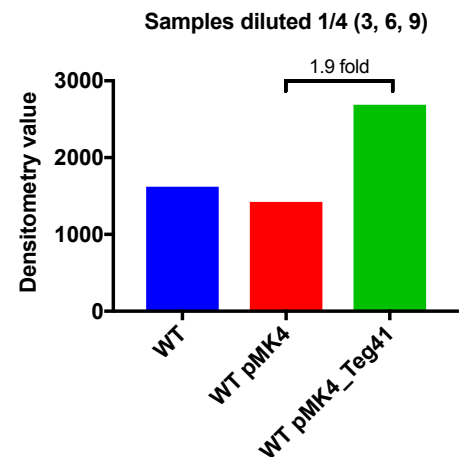

**Figure S2.** Densitometry analysis of butanol extracted PSMs. **A.** SDS-PAGE of butanol extracted PSMs from wild type *S. aureus* (WT), vector control (WT pMK4), and Teg41 overproducing strains (WT pMK4\_Teg41). Lanes 1, 4, and 7 are undiluted samples. Lanes 2, 5, and 8 are samples diluted 1/2. Lanes 3, 6, and 9 are samples diluted 1/4. **B.** Densitometry analysis of lanes 1, 4, and 7. **C.** Densitometry analysis of lanes 2, 5, and 8. **D.** Densitometry analysis of lanes 3, 6, and 9.
