# Supplementary material for: The Small RNA Teg41 Regulates Expression of the Alpha Phenol-Soluble Modulins and Is Required for Virulence in Staphylococcus aureus
Source: PubMed Central journal article supplement (PMC6428751; doi:10.1128/mbio.02484-18), 2019-02-05
Supplement: mBio.02484-18-sf003.pdf [file mBio.02484-18-sf003.pdf]

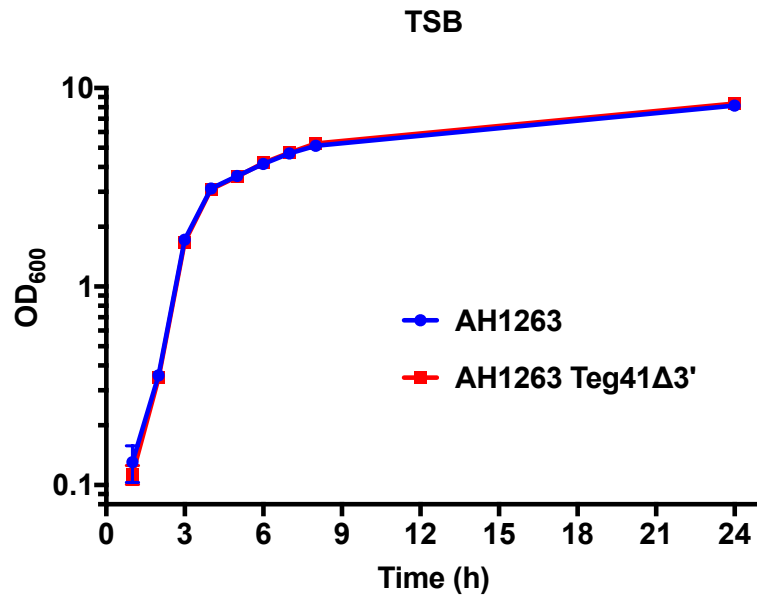

**Figure S3.** Growth of wild type *S. aureus* and the Teg41Δ3' mutant in TSB. No significant difference in growth was observed in either condition.
